# Supplementary material
Source: PubMed Central journal article supplement (PMC8579232)
Supplement: jama-e2117642-s002.pdf [file jama-e2117642-s002.pdf]

| <b>Group Name(s): Oncology Care Model Evaluation Team</b> |                  |                         |                                        |                                                 |                                                                |
|-----------------------------------------------------------|------------------|-------------------------|----------------------------------------|-------------------------------------------------|----------------------------------------------------------------|
| <b>First Name and Middle Initial(s)</b>                   | <b>Last Name</b> | <b>Academic Degrees</b> | <b>Institution</b>                     | <b>Location (city, state/province, country)</b> | <b>Role or Contribution, eg, chair, principal investigator</b> |
| Giulia                                                    | Norton           | PhD                     | Abt Associates                         | Cambridge, MA                                   | Health Economist                                               |
| Sean                                                      | McClellan        | PhD                     | Abt Associates                         | Cambridge, MA                                   | Health Services Researcher                                     |
| Jessie                                                    | Gerteis          | MPH                     | Abt Associates                         | Cambridge, MA                                   | Health Services Researcher                                     |
| Maria Alice                                               | Manetas          | BA                      | Abt Associates                         | Cambridge, MA                                   | Health Services Researcher                                     |
| Nathan                                                    | West             | MPH                     | Abt Associates                         | Cambridge, MA                                   | Health Services Researcher                                     |
| Andrew                                                    | Evans            | PhD                     | Abt Associates                         | Cambridge, MA                                   | Health Services Researcher                                     |
| Mary                                                      | Juergens         | MPH                     | Abt Associates                         | Cambridge, MA                                   | Health Services Researcher                                     |
| Stephanie                                                 | Shao             | MPH                     | GDIT                                   | Falls Church, VA                                | Senior Statistician                                            |
| Nirav S.                                                  | Kapedia          | MD, MS                  | Geisel School of Medicine at Dartmouth | Lebanon, NH                                     | Health Services Researcher                                     |
| Lauren                                                    | Riedel           | MPH                     | Harvard Medical School                 | Boston, MA                                      | Research Assistant                                             |
| Michael P-H                                               | Liu              | MD, PhD                 | Harvard Medical School                 | Boston, MA                                      | Statistician/Analyst                                           |
| Robert                                                    | Wolf             | MS                      | Harvard Medical School                 | Boston, MA                                      | Statistician/Analyst                                           |
| Hajime                                                    | Uno              | PhD                     | Dana-Farber Cancer Institute           | Boston, MA                                      | Statistician                                                   |
| Madison                                                   | Davidson         | MPH                     | Lewin Group                            | Falls Church, VA                                | Consultant                                                     |
| Rebecca                                                   | Acanfora         | MA                      | Lewin Group                            | Falls Church, VA                                | Senior Consultant                                              |
| Nwannamaka                                                | Ume              | MPH                     | Lewin Group                            | Falls Church, VA                                | Research Consultant                                            |
| David                                                     | Zhang            | MS                      | Lewin Group                            | Falls Church, VA                                | Sr Programmer                                                  |
| Dylan                                                     | Davis            | PhD                     | Lewin Group                            | Falls Church, VA                                | Consultant                                                     |
| Anna                                                      | Braendle         | BA                      | Lewin Group                            | Falls Church, VA                                | Senior Research Analyst                                        |
| Sehreen                                                   | Khan             | BA                      | Lewin Group                            | Falls Church, VA                                | Senior Research Analyst                                        |
| Chai                                                      | Wong             | MA                      | Lewin Group                            | Falls Church, VA                                | Senior Consultant                                              |
| Sebastian                                                 | Negrusa          | PhD                     | Lewin Group                            | Falls Church, VA                                | Health Economist                                               |
